# Supplementary material
Source: Springer Nature journal article supplement (https://www.springermedizin.de/resource/supplementary/12911_2011_518_MOESM2_ESM.pdf/9525982)
Supplement: MOESM2 [file 9525982]

|                                                                     |                   | Patients with COPD |      | Accumulated number of patients |          |
|---------------------------------------------------------------------|-------------------|--------------------|------|--------------------------------|----------|
| N=226                                                               |                   | N                  | %    | N                              | %        |
| Number of admissions with a lung related diagnosis                  |                   |                    |      |                                |          |
|                                                                     | 01.04.07-31.03.08 | 48                 | 18.0 | Period 1                       | 11 4.1   |
|                                                                     | 01.04.06-31.03.07 | 42                 | 15.8 | Period 1 or 2                  | 57 21.4  |
|                                                                     | 01.04.05-31.03.06 | 37                 | 13.9 | Period 1,2 or 3                | 78 29.3  |
|                                                                     | 01.04.04-31.03.05 | 32                 | 12.0 | Period 1,2,3 or 4              | 91 34.2  |
|                                                                     | 01.04.03-31.03.04 | 34                 | 12.8 | Period 1,2,3,4 or 5            | 100 37.6 |
| Redeemed prescription medication for a lung related diagnosis       |                   |                    |      |                                |          |
|                                                                     | 01.04.07-31.03.08 |                    |      |                                |          |
|                                                                     | At least once     | 188                | 70.7 |                                |          |
|                                                                     | At least twice    | 176                | 70.7 |                                |          |
| Spirometry performed at GP                                          |                   |                    |      |                                |          |
|                                                                     | 01.04.07-31.03.08 | 92                 | 34.6 |                                |          |
| Reversibility test performed at GP                                  |                   |                    |      |                                |          |
|                                                                     | 01.04.07-31.03.08 | 19                 | 7.1  |                                |          |
| 1 x redeemed prescription and spirometry / reversibility test at GP |                   | 77                 | 28.9 |                                |          |
| 2 x redeemed prescription and Spirometry / reversibility test at GP |                   | 75                 | 28.2 |                                |          |
| Spirometry performed at Consultant                                  |                   |                    |      |                                |          |
|                                                                     | 01.04.07-31.03.08 |                    |      |                                |          |
|                                                                     | At least once     | 2                  | 0.8  |                                |          |
|                                                                     | At least twice    | 0                  | 0.0  |                                |          |
